# Supplementary material for: Efficient Knockdown and Lack of Passenger Strand Activity by Dicer-Independent shRNAs Expressed from Pol II-Driven MicroRNA Scaffolds
Source: PubMed Central journal article supplement — Mol Ther Nucleic Acids. 2018 Dec 1;14:318–28. doi: 10.1016/j.omtn.2018.11.013 (PMC6348697; doi:10.1016/j.omtn.2018.11.013), 2018-12-01
Supplement: mmc1.pdf [file mmc1.pdf]

**OMTN, Volume 14**

**Supplemental Information**

**Efficient Knockdown and Lack of Passenger**

**Strand Activity by Dicer-Independent shRNAs**

**Expressed from Pol II-Driven MicroRNA Scaffolds**

**Erik Kaadt, Sidsel Alsing, Claudia R. Cecchi, Christian Kroun Damgaard, Thomas J. Corydon, and Lars Aagaard**



# Supplemental Figure 2

## A

### miR451 stem-loop structure

```
      A           GA           A
UUGGG AUGGCAAG AACCGUUACCAUUACUG G
GACCC UAUCGUUC UUGGUAAUGGUAAUGAU U
      A           UC           U
```

### miR451-12.3 stem-loop structure

```
      A           GA           C
UUGGG AUGGCAAG GUAGGAAGCUCAUCUCU C
GACCC UAUCGUUC CAUCCUUCGAGUAGAGA U
      A           UC           A
```

## B

### miR324 stem-loop structure

```
      GC           C   U   C   A   U   U   AAAG
GACUAU CUCCC GCA C CCU GGGCA UGG GU   C
CUGAUG GGGGG CGU G GGA CCCGU ACC CA   U
      UU           U   C   U   C           C   -   GAGG
```

### miR324-12.3 stem-loop structure

```
      GC           A           C
GACUAU CUCCC GUAGGAAGCUCAUCUCU C
CUGAUG GGGGG CAUCCUUCGAGUAGAGA U
      UU           C           A
```

## C

### miR215 stem-loop structure

```
      A           -----           A   A   A           -U   U           UAUAG
GAA UGGUAU           ACAGGA A   UG   CUA   GAA   UGACAGACAA           C
CUU AUCGUG           UGUCUU U   AC   GGAU   CUU   ACUGUCUGUU           U
      C           UCAGUA           A   A   C           UU   U           UGAG
```

### miR215-12.3 stem-loop structure

```
      A           -----           AAA           C
GAA UGGUAU           ACAGGA   GUAGGAAGCUCAUCUCU C
CUU AUCGUG           UGUCUU   CAUCCUUCGAGUAGAGA U
      C           UCAGUA           AUC           A
```

# Supplemental Figure 2

## D

### miR409 stem-loop structure

```
      U  GG  A   AC           -   -  AUC
GGUAC CG  GAG GGUU  CCGAGCAAC UUUG C   U
CUAUG GC  UUC CCAA  GGCUCGUUG AAGC G   G
      -  UU   C   GU           U   A CAG
```

### miR409-12.3 stem-loop structure

```
      U  GG  A                               C
GGUAC CG  GAG GUAGGAAGCUCaucucu C
CUAUG GC  UUC CAUCCUUCGAGUAGAGA U
      -  UU   C                               A
```

## E

### miR30a stem-loop structure

```
      A                               UC           -----  A
GCG CUGUAAAcaucc  GACUGGAAGCU           GUG A
CGU GACGUUUGUAGG  CUGACUUUCGG           CAC G
      C                               --           GUAGA  C
```

### miR30a-v1-12.3 stem-loop structure

```
      A                               C
GCG CAGUAGGAAGCUCaucucu C
CGU GUCAUCCUUCGAGUAGAGA U
      C                               A
```

### miR30a-v2-12.3 stem-loop structure

```
      ACA                               C
GCG GUAGGAAGCUCaucucu C
CGU CAUCCUUCGAGUAGAGA U
      CGC                               A
```

# Supplemental Figure 2

F

## miR106b stem-loop structure

```
      C      -UA      G      A A      -- UC
CCUGC GGGGC  AAGUGCU ACAGUGC G UAGU GG C
GGACG CCUCG  UUCAUGG UGUCACG C AUCG CC U
      A      UCG      G      C -      UG UC
```

## miR106b-v1-12.3 stem-loop structure

```
      C      AG      C
CCUGC GGGGC  UAGGAAGCUCAUCUCU C
GGACG CCUCG  AUCCUUCGAGUAGAGA U
      A      AGA      A
```

## miR106b-v2-12.3 stem-loop structure

```
      C      A      C
CCUGC GGGGC  GUAGGAAGCUCAUCUCU C
GGACG CCUCG  CAUCCUUCGAGUAGAGA U
      A      AC      A
```

## miR106b-v3-12.3 stem-loop structure

```
      C      CA      C
CCUGC GGGG  GUAGGAAGCUCAUCUCU C
GGACG CCUU  CAUCCUUCGAGUAGAGA U
      A      UC      A
```

# Supplemental Figure 3

**A**

Knockdown activity for agshRNAs embedded in miR scaffolds driven by the CMV promoter

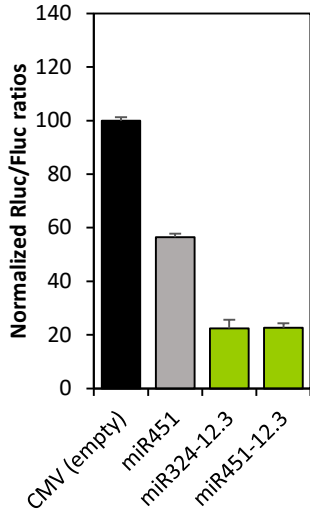

**B**

Passenger strand activity for CMV-expressed miR-agshRNAs chimeras

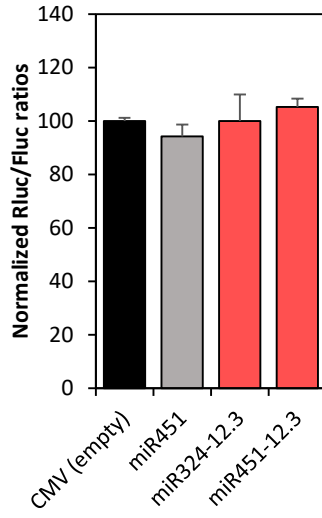

**C**

Activity for CMV-driven miR-agshRNAs in Dicer knockout cells

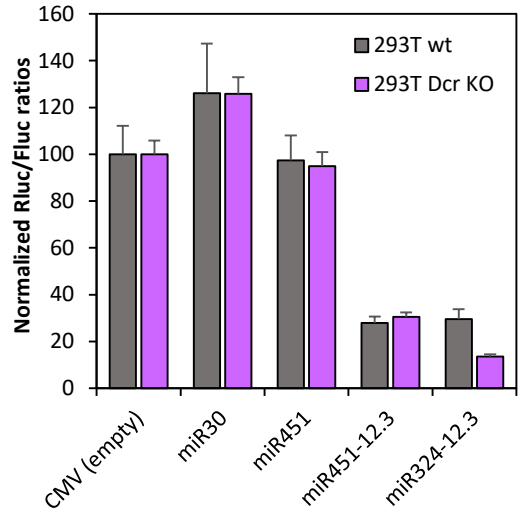



# Supplemental Figure 5

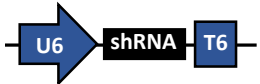

**Knockdown activity  
for the U6-driven shRNA  
targeting HIV-1 'site 1' (S1)**

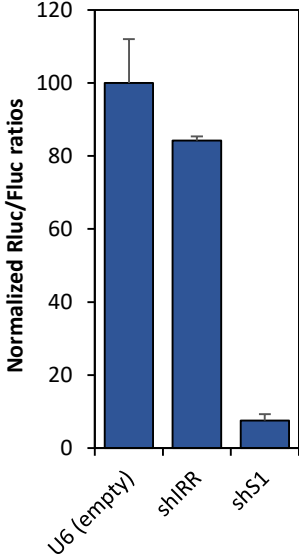



**Supplemental Figure 1: Comparison of conventional and Dicer-independent shRNA designs and two agoshRNA designs with varying loop size.** **A)** Schematic diagram of the dedicated T9-sense and T9-antisense psiCHECK2-based luciferase reporters used for comparing guide and passenger strand activity, respectively, for the various shRNA designs shown in Figure 1A. The illustration at the bottom shows the 100 nt long cDNA region of mVEGF (dubbed T9) encompassing ‘site 9’ which was cloned into the psiCHECK2-based reporter shown above in sense or antisense orientation (numbers indicate cDNA position). **B)** Knockdown activity of the shRNA designs depicted in Figure 1A when expressed by the human U6 promoter (pFTR-U6),<sup>29</sup> estimated by co-transfection a psiCHECK2-based Renilla luciferase reporter fused to a 100 nt stretch of the VEGF gene (T9-sense) or a corresponding antisense reporter (T9-antisense) as illustrated in panel A. Renilla luciferase (Rluc) and Firefly luciferase (Fluc) activity was measured in relative units of light (RLU). The Rluc/Fluc ratio was normalized to the empty control and plotted as the mean of three replicates plus standard deviations. **C)** Predicted secondary structure of the conventionally designed shRNAs targeting ‘site 9’ in the VEGF gene<sup>26</sup> (sh9, left side), or two loop variants of the Ago2-dependent agoshRNA structure, either a ‘19/5’ (agosh9, middle part) or a ‘19/3’ (agosh9/3, right side) design as

reported by the Berkhout lab.<sup>64</sup> The guide and passenger strands are depicted in green and red, respectively. The ‘Brummelkamp’ loop is shown in blue. The diagrams above show the constructs used in co-transfection assays. Upper part the psiCHECK2-based reporter fused to the full-length mVEGF cDNA, lower part the pSUPERretro-based H1-driven shRNA expression plasmid.<sup>26</sup> **D)** Knockdown activity of the shRNA designs shown in panel C when expressed by the human H1 promoter. The Rluc/Fluc ratio was normalized to the empty control and plotted as the mean of three replicates plus standard deviations. Abbreviations: Fluc, Firefly luciferase; HSV-tk, Herpes simplex virus thymidine kinase promoter; mVEGF, murine Vascular endothelial growth factor; pA, polyadenylation signal; R-luc, Renilla luciferase; shRNA, short hairpin RNA; SV40, simian virus 40 promoter; T6, T-rich pol-III termination signal; U6, human U6 snRNA promoter.

**Supplemental Figure 2: Predicted secondary structure of the stem loop region of native pri-miRs and VEGF 12.3 targeting derivatives.** **A)** Upper diagram depicts the stem loop structure of miR-451. The mature miR-451 is highlighted in pink. Lower diagram shows the structure of the miR-451 scaffold re-targeted towards VEGF (site 12.3). The VEGF targeting guide strand (21 nt) is shown in green. **B)** Upper diagram shows central part of pri-miR-324 and the location of the mature species (miR-324-5p and -3p, both highlighted in pink). Bottom diagram shows how the agsh12.3 stem loops structure was embedded in the pri-miR-324 scaffold at the predicted Drosha cleave site (VEGF targeting guide strand shown in green). **C)** Structure of the stem loop part of pri-miR-215 (top) and the corresponding miR215-agsh12.3 chimera (bottom). Mature miR strands and the 12.3 guide strand is shown in pink and green, respectively. **D)** Structure of the stem loop part of pri-miR-409 (top) and the corresponding miR409-agsh12.3 chimera (bottom). Colors as described above. **E)** Upper diagram shows the stem loop structure of pri-miR-30a. Diagrams below shows how the agsh12.3 stem loops structure was embedded in the pri-miR-30a scaffold at the predicted Drosha cleave site. The first

version (v1) mimics the miR-30a structure at the Drosha cleavage site and does not include the basal A-C 'fork' from the agsh12.3 'pre-miR structure', while the second version (v2) includes the A-C 'fork'. **F)** Upper diagram shows the stem loop structure of pri-miR-106b. The diagrams below show three different strategies to embed agsh12.3. The first version (v1) mimics the miR-106b large bulge at the Drosha cleavage site and does not include the basal A-C 'fork' from the agsh12.3 hairpin. The second (v2) includes the A-C 'fork', while the third version (v3) includes an A-CUU 'fork' reminiscent of pol-III termination ( $T_6$  box). All stem loop structures and prominent Drosha/Dicer cleavage sites shown in this figure, are based on data from miRBase<sup>67</sup> and the RNA secondary structure predictions algorithms MFOLD.<sup>68</sup>

**Supplemental Figure 3: Knockdown of VEGF in luciferase-based reporters using Dicer-independent shRNAs expressed as CMV-driven pri-miR-324 or -451 transcripts.** **A)** Knockdown activity of VEGF-targeting CMV-expressed agshRNA embedded in various miR scaffolds, estimated by co-transfection with psiCHECK-mVEGF-T12-sense. The Rluc/Fluc ratio was normalized to the empty control (black bar) and plotted as the mean of three replicates plus standard deviations. Endogenous miR-451 was included as a non-targeting control (grey bar). **B)** Passenger strand activity for CMV-driven miR324- and miR451-agshRNAs as measured using the psiCHECK-mVEGF-T12-antisense reporter and plotted as described in panel A. **C)** Knockdown levels of CMV-expressed miR-agsh12.3 constructs in Dicer knockout cells<sup>35</sup> (purple bars) and the parental 293T control cells (grey bars) as based on psiCHECK-mVEGF-T12-sense reporter and plotted as described in panel A, including miR-30 as a non-targeting control.

**Supplemental Figure 4: Processing of miR-324- and miR-451-agshRNAs transcripts is Dicer-independent:** Northern blot analysis of small RNA from transfected 293T cells and DcrKO 293T cells (NoDice 2-20) using probes detecting guide strand RNA (antisense probe, autoradiogram on left side) or passenger strand RNA (sense probe, autoradiogram on right side). The autoradiograms are short time exposures of the cropped images seen in Figure 2D (293T cells) and Figure 3C (Dcr KO cells). Size of 10, 20, 30, 40, and 50 nt band of the RNA decade marker is indicated, and agsh12.3-specific bands are marked by arrows and labeled a-c. A cropped image with detection of the native U6 snRNA band (loading control) is shown below.

**Supplemental Figure 5: Knockdown activity of the U6-driven shS1:** Knockdown activity of the conventionally designed (pBluescriptIISK-based) shS1 construct targeting the HIV-1 tat/rev transcript (site 1)<sup>34</sup>, using experimental conditions similar to the data presented in Figure 4 for the pol-II driven miR-agshS1 constructs. The Rluc/Fluc ratio as measured by the psiCHECK-HIV-S1 reporter was normalized to the empty control (pBluescriptIISK-based) and plotted as the mean of three replicates plus standard deviations. An irrelevant HIV-1 ‘site 2’ targeting shRNA (shIRR) was included as a non-targeting control.

**Supplemental table 1**

| Oligo ID                  | Name   | Sequence (5'-3')        |
|---------------------------|--------|-------------------------|
| <b>Sequencing primers</b> |        |                         |
| 350                       | CMV-F  | GCAAATGGGCGGTAGGCGTGTAC |
| 351                       | BGH-R  | AGGGGCAAACAACAGATGGC    |
| 352                       | BGH-R2 | GAAGGCACAGTCGAGGCTGATCA |
| 353                       | 5AMP-R | AAGGGAATAAGGGCGCACACG   |

|                                                          |                 |                                                                           |
|----------------------------------------------------------|-----------------|---------------------------------------------------------------------------|
| 354                                                      | 3hLuc-F         | GAGGACGCTCCAGATGAAATG                                                     |
| 355                                                      | 5TK-R           | CGTCAGACAAACCCTAACCAC                                                     |
| 350                                                      | CMV-F           | GCAAATGGGCGGTAGGCGTGTAC                                                   |
| 489                                                      | pcDNA3-5prom-F  | TAAGCTACAACAAGGCAAGGCT                                                    |
| <b>Cloning of psiCHECK2.2 based reporters</b>            |                 |                                                                           |
| 487                                                      | mVEGF-R3-NotI-F | GAGAGCGGCCGCCATCACCATGCAGATCATGC                                          |
| 488                                                      | mVEGF-R3-NotI-R | GAGAGCGGCCGCTCTGTCTTTCTTTGGTCTGC                                          |
| 361                                                      | mVEGF-R4-NotI-F | GAGAGCGGCCGCGAGAAAGCATTGTTTGTCCAAG                                        |
| 362                                                      | mVEGF-R4-NotI-R | GAGAGCGGCCGCTCACCGCCTTGGCTTGTAC                                           |
| 481                                                      | RRM2-887-A      | TCGAAGGCTACCTATGGTGAACGTGTTGTAGC                                          |
| 482                                                      | RRM2-887-B      | GGCCGCTACAACACGTTCCACCATAGGTAGCCT                                         |
| 483                                                      | RRM2-1354-A     | TCGAGTGATGTCAAGTCCAACAGAGAATTCTT                                          |
| 484                                                      | RRM2-1354-B     | GGCCAAGAATTCTCTGTTGGACTTGACATCAC                                          |
|                                                          | HIV-S1-A        | TCGAAAGCGGAGACAGCGACGAAGAGCT                                              |
|                                                          | HIV-S1-B        | GGCCAGCTCTTCGTGCTGTCTCCGCTT                                               |
| <b>Cloning of pcDNA3-based pri-miR constructs</b>        |                 |                                                                           |
| 465                                                      | miR106b-F       | ATATACTCGAGTGGTAAGTGCCCAAATTGCTG                                          |
| 466                                                      | miR106b-R       | TGTGTACCGGTGGATCTAGGACACATGGAGTG                                          |
| 467                                                      | miR451-F        | ATATACTCGAGCCAGCTCTGGAGCCTGACAAG                                          |
| 468                                                      | miR451-R        | TGTGTACCGGTACCCCTGCCTTGTGTTGAGCTG                                         |
| 469                                                      | miR30a-F        | ATATACTCGAGCAGAATCGTTGCCTGCACATC                                          |
| 470                                                      | miR30a-R        | TGTGTACCGGTATGTATCAAAGAGATAGCAAGGT                                        |
| <b>Cloning of pcDNA3-based promoter and MCS variants</b> |                 |                                                                           |
| 207                                                      | MCS-A           | CTAGCCTCGAGGGATCCGAATTCTCCGGATTTTTTACC<br>GGTGGGCC                        |
| 208                                                      | MCS-B           | CACCGGTAAAAAATCCGGAGAATTCGGATCCCTCGAG<br>G                                |
| 209                                                      | U1prom-MluI-F   | CAACAAACGCGTCTAAGGACCAGCTTCTTTGGGAGA                                      |
| 210                                                      | U1term-ApaI-R   | CAACAAGGGCCCGTCTACTTTTGAACTCCAGAAAGT<br>GGATCACCGGTCTGCAGGAATTCGATATCAAGC |
| <b>Cloning of pSUPERretro-based H1 constructs</b>        |                 |                                                                           |
| 451                                                      | agosh9-A        | GATCCCCATTTACACGTCTGCGGATCCAAGAGATCCGC<br>AGACGTGTAAATTTTTTC              |
| 452                                                      | agosh9-B        | TCGAGAAAAAATTTACACGTCTGCGGATCTCTTGGATC<br>CGCAGACGTGTAAATGGG              |
| 447                                                      | agosh9/3-A      | GATCCCCATTTACACGTCTGCGGATCAGAGATCCGCAG<br>ACCTGTAAATTTTTTC                |
| 448                                                      | agosh9/3-B      | TCGAGAAAAAATTTACACGTCTGCGGATCTCTGATCCG<br>CAGACGTGTAAATGGG                |
| <b>Cloning of pFRT-U6-based constructs</b>               |                 |                                                                           |
| 429                                                      | sh9-A           | GATCGATCCGCAGACGTGTAAATGTTTCAAGAGAACAT<br>TTACACGTCTGCGGATCTTTTT          |
| 430                                                      | sh9-B           | TCGAAAAAACATCCGCAGACGTGTAAATGTTCTCTTGA<br>AACATTTACACGTCTGCGGATC          |
| 425                                                      | agosh9-A        | GATCATTACACGTCTGCGGATCCAAGAGATCCGCAGA<br>CGTGTAAATTTTTT                   |

|                                                        |                 |                                                                                                                                                                                                                                                                                     |
|--------------------------------------------------------|-----------------|-------------------------------------------------------------------------------------------------------------------------------------------------------------------------------------------------------------------------------------------------------------------------------------|
| 426                                                    | agosh9-B        | <b>TCGAAAAAATTTACACGTCTGCGGATCTCTTGGATCCGCAGACGTGTAAT</b>                                                                                                                                                                                                                           |
| 475                                                    | agsh9-A         | <b>GATCAATTTACACGTCTGCGGATCTTCCGCAGACGTGTAAATCTTTTT</b>                                                                                                                                                                                                                             |
| 476                                                    | agsh9-B         | <b>TCGAAAAAAGATTTACACGTCTGCGGAAAGATCCGCA GACGTGTAATTT</b>                                                                                                                                                                                                                           |
| 427                                                    | agsh11-A        | <b>GATCAACATTTACACGTCTGCGGATCCGCAGACGTGTA AATGTCTTTTT</b>                                                                                                                                                                                                                           |
| 428                                                    | agsh11-B        | <b>TCGAAAAAAGACATTTACACGTCTGCGGATCCGCAGA CGTGTAAATGTT</b>                                                                                                                                                                                                                           |
| 433                                                    | agsh12.1-A      | <b>GATCACTGTAGGAAGCTCATCTCTCCAGATGAGCTTCC TACAGCTTTTT</b>                                                                                                                                                                                                                           |
| 434                                                    | agsh12.1-B      | <b>TCGAAAAAAGCTGTAGGAAGCTCATCTGGAGAGATGA GCTTCCTACAGT</b>                                                                                                                                                                                                                           |
| 435                                                    | agsh12.2-A      | <b>GATCATGTAGGAAGCTCATCTCTCCTGAGATGAGCTTC CTACACTTTTT</b>                                                                                                                                                                                                                           |
| 436                                                    | agsh12.2-B      | <b>TCGAAAAAAGTGTAGGAAGCTCATCTCAGGAGAGATG AGCTTCCTACAT</b>                                                                                                                                                                                                                           |
| 437                                                    | agsh12.3-A      | <b>GATCAGTAGGAAGCTCATCTCTCCTAAGAGATGAGCTT CCTACCTTTTT</b>                                                                                                                                                                                                                           |
| 438                                                    | agsh12.3-B      | <b>TCGAAAAAAGGTAGGAAGCTCATCTCTTAGGAGAGAT GAGCTTCCTACT</b>                                                                                                                                                                                                                           |
| 477                                                    | sh12.3-A        | <b>GATCGGAGAGATGAGCTTCCTACTTCAAGAGAGTAGG AAGCTCATCTCTCTTTTT</b>                                                                                                                                                                                                                     |
| 478                                                    | sh12.3-B        | <b>TCGAAAAAAGGAGAGATGAGCTTCCTACTCTCTTGAAG TAGGAAGCTCATCTCTCC</b>                                                                                                                                                                                                                    |
| 471                                                    | agsh13-A        | <b>GATCAAAGTACGTTTCGTTTAACTCAAGTTAAACGAACG TACTTCTTTTT</b>                                                                                                                                                                                                                          |
| 472                                                    | agsh13-B        | <b>TCGAAAAAAGAAGTACGTTTCGTTTAACTTGAGTTAAAC GAACGACTTT</b>                                                                                                                                                                                                                           |
| <b>Synthetic pri-miR-dishRNA inserts (pUC57-based)</b> |                 |                                                                                                                                                                                                                                                                                     |
|                                                        | miR30a-v1-12.3  | <b>CTCGAGACAGAATCGTTGCCTGCACATCTTGAAACAC TTGCTGGGATTACTTCTTCAGGTTAACCCAACAGAAGG CTAAAGAAGGTATATTGCTGTTGACAGTGAGCGACAGT AGGAAGCTCATCTCTCCTAAGAGATGAGCTTCCTACTG CTGCCTACTGCCTCGGACTTCAAGGGGCTACTTTAGGA GCAATTATCTTGTTTACTAAAACCTGAATACCTTGCTATC TCTTTGATACATTTTTACAAAGCTGAAACCGGT</b> |
|                                                        | miR30a-v2-12.3  | <b>CTCGAGACAGAATCGTTGCCTGCACATCTTGAAACAC TTGCTGGGATTACTTCTTCAGGTTAACCCAACAGAAGG CTAAAGAAGGTATATTGCTGTTGACAGTGACCGACAGT AGGAAGCTCATCTCTCCTAAGAGATGAGCTTCCTACCG CTGGCTACTGCCTCGGACTTCAAGGGGCTACTTTAGGA GCAATTATCTTGTTTACTAAAACCTGAATACCTTGCTATC TCTTTGATACATTTTTACAAAGCTGAAACCGGT</b> |
|                                                        | miR106b-v1-12.3 | <b>CTCGAGTGGTAAGTGCCCAAATTGCTGGAGGGCCATCT GTTTTGACCCTTAAAGGGGTAGCTCCTTACCGTGCTCTC</b>                                                                                                                                                                                               |

|  |                 |                                                                                                                                                                                                                                                                                                                                                                    |
|--|-----------------|--------------------------------------------------------------------------------------------------------------------------------------------------------------------------------------------------------------------------------------------------------------------------------------------------------------------------------------------------------------------|
|  |                 | ATTGCCGCCTCCCCACCTCCCGCTCCAGCCCTGCCGGG<br>GCAGTAGGAAGCTCATCTCTCCTAAGAGATGAGCTTCC<br>TAAGAGCTCCAGCAGGGCACGCACAGCGTCCGTGGAG<br>GGAAAGGCCTTTTCCCCACTTCTTAACCTTCACTGAGA<br>GGGTGGTTGGGGTCTGTTTCACTCCATGTGTCCTAGATC<br><b>CTACCGGT</b>                                                                                                                                  |
|  | miR106b-v2-12.3 | <b>CTCGAGTGGTAAGTGCCCAAATTGCTGGAGGGCCATCT</b><br>GTTTTGACCCTTAAAGGGGTAGCTCCTTACCGTGCTCTC<br>ATTGCCGCCTCCCCACCTCCCGCTCCAGCCCTGCCGGG<br>GCAGTAGGAAGCTCATCTCTCCTAAGAGATGAGCTTCC<br>TACCAGCTCCAGCAGGGCACGCACAGCGTCCGTGGAG<br>GGAAAGGCCTTTTCCCCACTTCTTAACCTTCACTGAGA<br>GGGTGGTTGGGGTCTGTTTCACTCCATGTGTCCTAGATC<br><b>CTACCGGT</b>                                      |
|  | miR106b-v3-12.3 | <b>CTCGAGTGGTAAGTGCCCAAATTGCTGGAGGGCCATCT</b><br>GTTTTGACCCTTAAAGGGGTAGCTCCTTACCGTGCTCTC<br>ATTGCCGCCTCCCCACCTCCCGCTCCAGCCCTGCCGGG<br>GCAGTAGGAAGCTCATCTCTCCTAAGAGATGAGCTTCC<br>TACCTTTCCAGCAGGGCACGCACAGCGTCCGTGGAGGG<br>AAAGGCCTTTTCCCCACTTCTTAACCTTCACTGAGAGG<br>GTGGTTGGGGTCTGTTTCACTCCATGTGTCCTAGATCCT<br><b>ACCGGT</b>                                       |
|  | miR215-12.3     | <b>CTCGAGGTTTTATAAAAATTAACAAATGATTAAGAATTA</b><br>ATATCAATTTTCTTAAATTCAAGTTTTGTAACACCAAAA<br>AGATCCAATAATGGAAGAGGATTAAGATCATCATTAG<br>AAATGGTATACAGGAAAAGTAGGAAGCTCATCTCTCCT<br>AAGAGATGAGCTTCTTACCTATTCTGTATGACTGTGCT<br>ACTTCAATATCAGAAATCGACTAACACCACGCAACCAA<br>CGCAATGGCAGGTACACAGAAGATAATCTGTAACACTA<br>CCATGTAAATGTATTGAGTAAATAAAACATA <b>ACCGGT</b>        |
|  | miR324-12.3     | <b>CTCGAGTTCTTAAAGGGGTGGATGTAAGGGATGAGG</b><br>TAGAATTAACCTTCTGGTACTGCTGGCAGGCACCTGAGC<br>AGAACATCATTGCTGTCTCTCTTCGCAGAAGCTGAGCT<br>GACTATGCCTCCAGTAGGAAGCTCATCTCTCCTAAGA<br>GATGAGCTTCTACCGGGGGTTGTAGTCTGACCCGACT<br>GGGAAGAAAGCCCCAGGGCTCCAGGGAGAGGGGGCTTG<br>GGAGGCCCTCACCTCAGTTACATACTGCAGCATAACCA<br>TCCGTGCCAGCTTCTCCTGGATCAGCCCAAAGTTGTGA<br><b>AACCGGT</b> |
|  | miR409-12.3     | <b>CTCGAGTCTGGGCTCTGAATGCCAGACCTTGTGCTGC</b><br>CCTTGGGGGAGGGTCTTCTGCAAGCACAGCCGCCTGCA<br>AGCATTACCTTAGTCCGAGCATCTGAGCCTGGTACTC<br>GGGAGAGTAGGAAGCTCATCTCTCCTAAGAGATGAG<br>CTTCTTACCCTTTTCGGTATCAGCTGGGGCACCTCGGGG<br>AAGGACGCCGCATCAGCACCATTCTGGGGTACGGGG<br>ATGGATGGTCGACCAGTTGGAAAGTAATTGTTTCTAAT<br>GTACTTCA <b>ACCGGT</b>                                     |

|  |                 |                                                                                                                                                                                                                                                                                                                                                                                                                              |
|--|-----------------|------------------------------------------------------------------------------------------------------------------------------------------------------------------------------------------------------------------------------------------------------------------------------------------------------------------------------------------------------------------------------------------------------------------------------|
|  | miR451-12.3     | <b>CTCGAGCCAGCTCTGGAGCCTGACAAGGAGGACAGGA</b><br><b>GAGATGCTGCAAGCCCAAGAAGCTCTCTGCTCAGCCTG</b><br><b>TCACAACCTACTGACTGCCAGGGCACTTGGGAATGGCA</b><br><b>AGGAGTAGGAAGCTCATCTCTCCTAAGAGATGAGCTTC</b><br><b>CTACCTCTTGCTATACCCAGAAAACGTGCCAGGAAGAG</b><br><b>AACTCAGGACCCTGAAGCAGACTACTGGAAGGGGAGAC</b><br><b>TCCAGCTCAAACAAGGCAGGGGT<b>ACCGGT</b></b>                                                                             |
|  | miR324-HIV-S1   | <b>CTCGAGTTCTTAAAAGGGGTGGATGTAAGGGATGAGG</b><br><b>TAGAATTAACCTTCTGGTACTGCTGGCAGGCACCTGAGC</b><br><b>AGAACATCATTGCTGTCTCTCTTCGCAGAAGCTGAGCT</b><br><b>GACTATGCCTCCCATCTTCGTCTGCTGTCTCCGCTTGGAG</b><br><b>ACAGCGACGAAGACGGGGGTGTAGTCTGACCCGACT</b><br><b>GGGAAGAAAGCCCCAGGGCTCCAGGGAGAGGGGCTTG</b><br><b>GGAGGCCCTCACCTCAGTTACATACTGCAGCATAACCA</b><br><b>TCCGTGCCAGCTTCTCCTGGATCAGCCCAAAGTTGTGA</b><br><b>A<b>ACCGGT</b></b> |
|  | miR451-HIV-S1   | <b>CTCGAGCCAGCTCTGGAGCCTGACAAGGAGGACAGGA</b><br><b>GAGATGCTGCAAGCCCAAGAAGCTCTCTGCTCAGCCTG</b><br><b>TCACAACCTACTGACTGCCAGGGCACTTGGGAATGGCA</b><br><b>AGGATCTTCGTCTGCTGTCTCCGCTTGGAGACAGCGACG</b><br><b>AAGACTCTTGCTATACCCAGAAAACGTGCCAGGAAGA</b><br><b>GAACTCAGGACCCTGAAGCAGACTACTGGAAGGGGAGA</b><br><b>CTCCAGCTCAAACAAGGCAGGGGT<b>ACCGGT</b></b>                                                                            |
|  | miR215-RRM2-887 | <b>CTCGAGGTTTTATAAAATTAACAAATGATTAAGAATTA</b><br><b>ATATCAATTTTCTTAAATTCAAGTTTTGTAACACCAAAA</b><br><b>AGATCCAATAATGGAAGAGGATTAAGTCATCATTAG</b><br><b>AAATGGTATACAGGAAAACAACACGTTACCATAGGT</b><br><b>AGTTATGGTGAACGTGTTGCTATTCTGTATGACTGTGCT</b><br><b>ACTTCAATATCAGAAATCGACTAACACCACGCAACCAA</b><br><b>CGCAATGGCAGGTACACAGAAGATAATCTGTAACACTA</b><br><b>CCATGTAAATGTATTGAGTAAATAAAACATA<b>ACCGGT</b></b>                     |
|  | miR324-RRM2-887 | <b>CTCGAGTTCTTAAAAGGGGTGGATGTAAGGGATGAGG</b><br><b>TAGAATTAACCTTCTGGTACTGCTGGCAGGCACCTGAGC</b><br><b>AGAACATCATTGCTGTCTCTCTTCGCAGAAGCTGAGCT</b><br><b>GACTATGCCTCCCACAACACGTTACCATAGGTAGTTA</b><br><b>TGGTGAACGTGTTGCGGGGGTGTAGTCTGACCCGACT</b><br><b>GGGAAGAAAGCCCCAGGGCTCCAGGGAGAGGGGCTTG</b><br><b>GGAGGCCCTCACCTCAGTTACATACTGCAGCATAACCA</b><br><b>TCCGTGCCAGCTTCTCCTGGATCAGCCCAAAGTTGTGA</b><br><b>A<b>ACCGGT</b></b>   |
|  | miR409-RRM2-887 | <b>CTCGAGTCTGGGCTCTGAATGCCAGACCTTGTGCTGC</b><br><b>CCTTGGGGGAGGGTCTTCTGCAAGCACAGCCGCCTGCA</b><br><b>AGCATTACCTTAGTCCGAGCATCTGAGCCTGGTACTC</b><br><b>GGGGAGACAACACGTTACCATAGGTAGTTATGGTGAA</b><br><b>CGTGTTCCTTTTCGGTATCAGCTGGGGCACCTCGGGG</b><br><b>AAGGACGCCGGCATCAGCACCATTCTGGGGTACGGGG</b><br><b>ATGGATGGTCGACCAGTTGGAAAGTAATTGTTTCTAAT</b><br><b>GTACTTCA<b>ACCGGT</b></b>                                               |



|                             |                  |                                                                                                                                                                                                                                                                                                                                                                      |
|-----------------------------|------------------|----------------------------------------------------------------------------------------------------------------------------------------------------------------------------------------------------------------------------------------------------------------------------------------------------------------------------------------------------------------------|
|                             | miR451-RRM2-887  | <b>CTCGAGCCAGCTCTGGAGCCTGACAAGGAGGACAGGA</b><br>GAGATGCTGCAAGCCCAAGAAGCTCTCTGCTCAGCCTG<br>TCACAACCTACTGACTGCCAGGGCACTTGGGAATGGCA<br>AGGACAACACGTTACCCATAGGTAGTTATGGTGAACGT<br>GTTGCTCTTGCTATACCCAGAAAACGTGCCAGGAAGAG<br>AACTCAGGACCCTGAAGCAGACTACTGGAAGGGAGAC<br>TCCAGCTCAAACAAGGCAGGGGT <b>ACCGGT</b>                                                               |
|                             | miR215-RRM2-1354 | <b>CTCGAGGTTTTATAAAATTAACAAATGATTAAGAATTA</b><br>ATATCAATTTTCTTAAATTCAAGTTTTGTAACACCAAAA<br>AGATCCAATAATGGAAGAGGATTAAGTTCATTCATTAG<br>AAATGGTATACAGGAAAAATTCTCTGTTGGACTTGACA<br>TTAAGTCCAACAGAGAATCTATTCTGTATGACTGTGCT<br>ACTTCAATATCAGAAATCGACTAACACCACGCAACCAA<br>CGCAATGGCAGGTACACAGAAGATAATCTGTAACACTA<br>CCATGTAAATGTATTGAGTAAATAAAACATA <b>ACCGGT</b>          |
|                             | miR324-RRM2-1354 | <b>CTCGAGTTCTTAAAAGGGGTGGATGTAAGGGATGAGG</b><br>TAGAATTAACCTTCTGGTACTGCTGGCAGGCACCTGAGC<br>AGAACATCATTGCTGTCTCTCTTCGCAGAAGCTGAGCT<br>GACTATGCCTCCCAATTCTCTGTTGGACTTGACATTAAG<br>TCCAACAGAGAATCGGGGGTTGTAGTCTGACCCGACTG<br>GGAAGAAAGCCCCAGGGCTCCAGGGAGAGGGGCTTGG<br>GAGGCCCTCACCTCAGTTACATACTGCAGCATAACCAT<br>CCGTGCCAGCTTCTCCTGGATCAGCCCAAAGTTGTGAA<br><b>ACCGGT</b> |
|                             | miR409-RRM2-1354 | <b>CTCGAGTCTGGGCTCTGAATGCCAGACCTTGTGCTGC</b><br>CCTTGGGGGAGGGTCTTCTGCAAGCACAGCCGCCTGCA<br>AGCATTACCTTAGTCCGAGCATCTGAGCCTGGTACTC<br>GGGGAGAATTCTCTGTTGGACTTGACATTAAGTCCAAC<br>AGAGAATCCTTTTCGGTATCAGCTGGGGCACCTCGGGG<br>AAGGACGCCGGCATCAGCACCATTCTGGGGTACGGGG<br>ATGGATGGTCGACCAGTTGGAAAGTAATTGTTTCTAAT<br>GTA CTTCA <b>ACCGGT</b>                                    |
|                             | miR451-RRM2-1354 | <b>CTCGAGCCAGCTCTGGAGCCTGACAAGGAGGACAGGA</b><br>GAGATGCTGCAAGCCCAAGAAGCTCTCTGCTCAGCCTG<br>TCACAACCTACTGACTGCCAGGGCACTTGGGAATGGCA<br>AGGAATTCTCTGTTGGACTTGACATTAAGTCCAACAGA<br>GAATCTCTTGCTATACCCAGAAAACGTGCCAGGAAGAG<br>AACTCAGGACCCTGAAGCAGACTACTGGAAGGGAGAC<br>TCCAGCTCAAACAAGGCAGGGGT <b>ACCGGT</b>                                                               |
| <b>Northern blot probes</b> |                  |                                                                                                                                                                                                                                                                                                                                                                      |
| 382                         | U6               | TATGGAACGCTTCTCGAATT                                                                                                                                                                                                                                                                                                                                                 |
| C146                        | 12.3-antisense   | <u>AGAGATGAGCTTCCTAC</u>                                                                                                                                                                                                                                                                                                                                             |
| C145                        | 12.3-sense       | <u>GTAGGAAGCTCATCTCT</u>                                                                                                                                                                                                                                                                                                                                             |
| C147                        | 12.3-sense-short | <u>GTAGGAAGCTCAT</u>                                                                                                                                                                                                                                                                                                                                                 |

Restriction site tags or compatible overhangs marked in bold. LNAs are underlined.
